# Supplementary material for: Precise surface functionalization of PLGA particles for human T cell modulation
Source: Springer Nature journal article supplement (doi:10.1038/s41596-023-00887-8), 2023-10-18
Supplement: MOESM2 [file 41596_2023_887_MOESM2_ESM15.xlsx]

## Sheet: Sheet1
Order Of Addition							2	3	1		4	5
PLGA-PEG-Mal Identifier	PLGA-PEG-Mal : DNA Ratio	Target PLGA-PEG-Mal concentration (µM)	Total DNA (nmol)	Total DNA (µM)	PLGA-PEG-Mal molecular number (Da)	Total Reaction volume (µL)	Volume of DNA (µL)	Triethylamine volume (µL)	Extra TE buffer volume (µL)	PLGA-PEG-Mal needed (mg)	Extra DMF volume (µL)	30 mg/mL PLGA-PEG-Mal DMF volume (µL)
Lot XXXX	1	200	602	3010	22941	3010	200	30.1	101	13.8105	2218.55	460.349
	=	Predetermined (enter these values manually)
	=	Excel calculated, do not enter values manually
													The reaction occurs in a 90% organic (DMF) and 10% aqueous (TE). The aqueous phase constitutes the 500 nmol of DNA and additional TE buffer needed to reach 10% aqueous final volume. The organic phase contains enough dissolved PLGA-PEG-Mal to match the desired PLGA-PEG-Mal : DNA molar ratio, the basic catalyst triethylamine to yield 1% of the total reaction volume, and additional DMF to reach 90% …
